# Supplementary material
Source: publisher figshare collection journal article supplement (https://acs.figshare.com/ndownloader/files/9842761)
Supplement: Supplementary file 1 [file 9842761]

*Supporting information for*

## **Two-Dimensional Lead Halide Perovskites Templated by a Conjugated Asymmetric Diammonium**

*Matthew P. Hautzinger<sup>1</sup>, Jun Dai<sup>2</sup>, Yujin Ji<sup>3</sup>, Yongping Fu<sup>1</sup>, Jie Chen<sup>1</sup>, Ilia A. Guzei<sup>1</sup>, John C. Wright<sup>1</sup>, Youyong Li<sup>3</sup>, Song Jin<sup>1\*</sup>*

<sup>1</sup>Department of Chemistry, University of Wisconsin-Madison, 1101 University Avenue, Madison, Wisconsin 53706, United States

<sup>2</sup>Department of Physics, College of Science, Jiangsu University of Science and Technology, Zhenjiang 212003, People's Republic of China.

<sup>3</sup>Institute of Functional Nano & Soft Materials (FUNSOM), Soochow University, Suzhou 215123, People's Republic of China

**Equations used to calculate Quadratic Elongation ( $\langle\lambda\rangle$ ) and Bond angle variance ( $\sigma^2$ ).<sup>S1, S2</sup>**

Equation S1: Quadratic Elongation ( $\langle\lambda\rangle$ )

$$\langle\lambda\rangle = \frac{1}{6} \sum_{\{i=1\}}^6 \left(\frac{d_i}{d_o}\right)^2$$

Where  $d_i$  is the Pb-X bond length,  $d_o$  is the Pb-X bond length from an ideal octahedron of the same volume,  $\langle\lambda\rangle$  is dimensionless.

Equations S2: Bond angle variance ( $\sigma^2$ )

$$\sigma^2 = \frac{1}{11} \sum_{\{i=1\}}^{12} (\alpha_i - 90)^2$$

Where  $\alpha_i$  is the Pb-X-Pb bond angles of the octahedra.

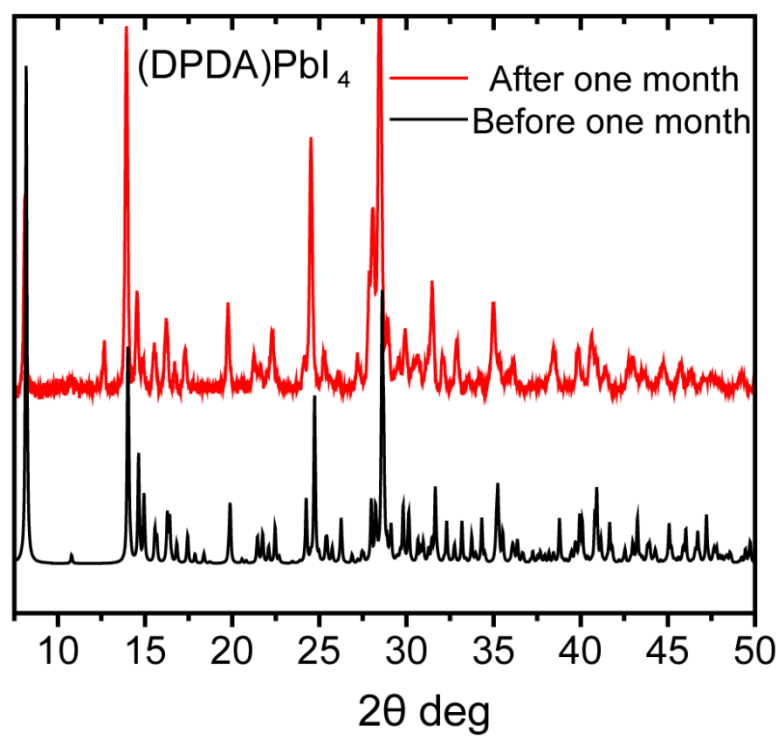

Figure S1. PXRD patterns of (DPDA)PbI<sub>4</sub> powders (crushed from single crystals) before and after one month of storage in ambient conditions.

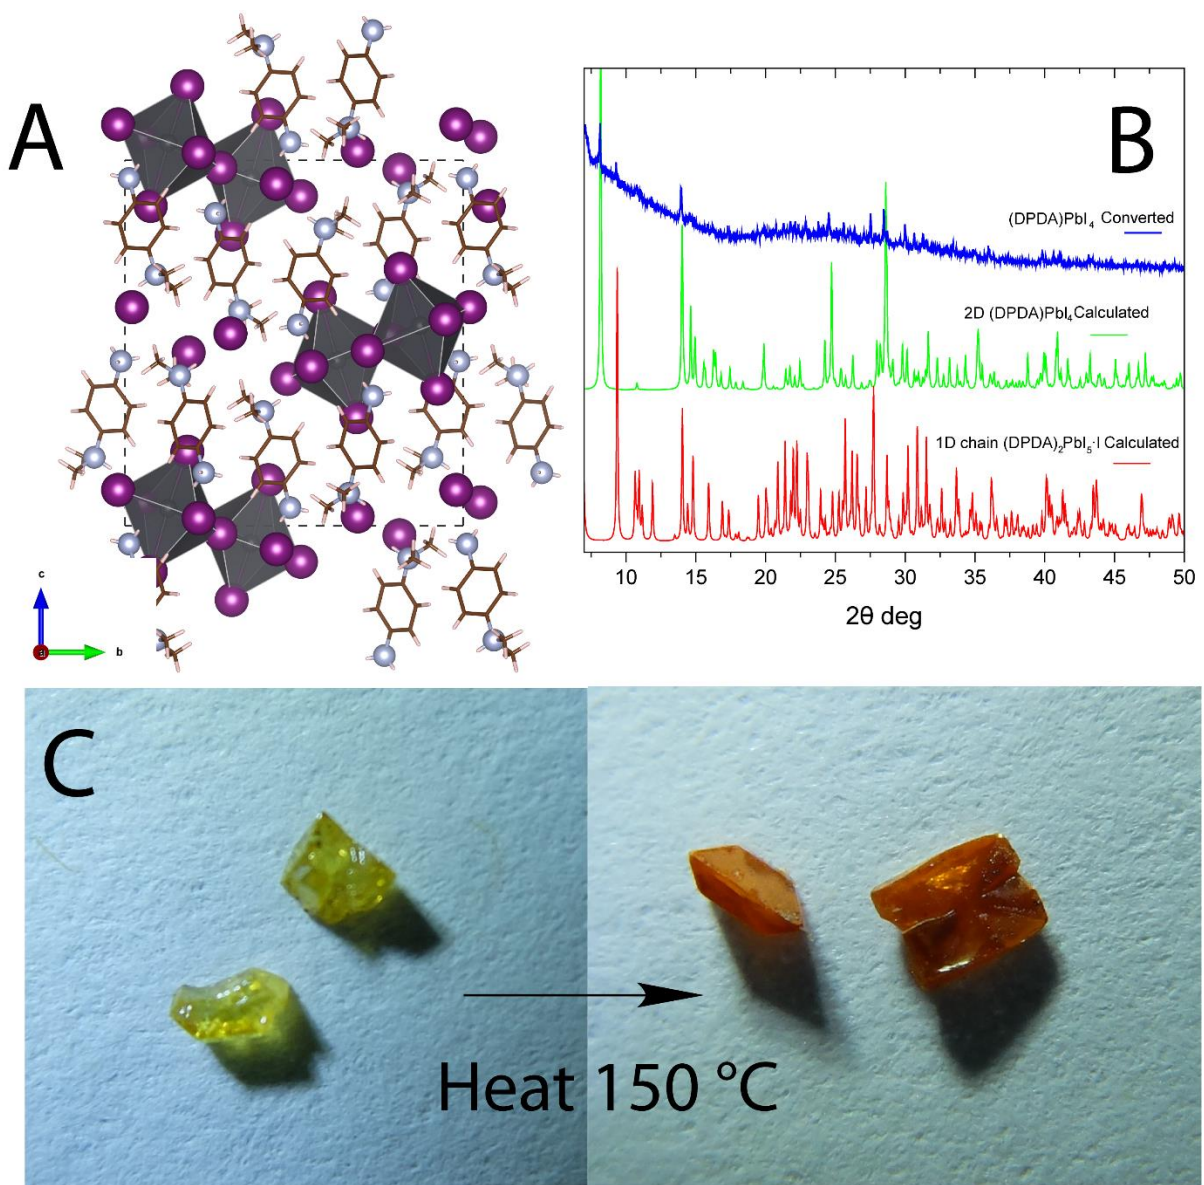

Figure S2. (A) Crystal structure of  $(\text{DPDA})_2\text{PbI}_5 \cdot \text{I}$  showing 1D corner sharing chains. Upon heating, these crystals turned from yellow to red (C) and showed peaks of the 2DN perovskite in the PXRD pattern (B) indicating partial degradation/conversion to the 2DN layered compound.

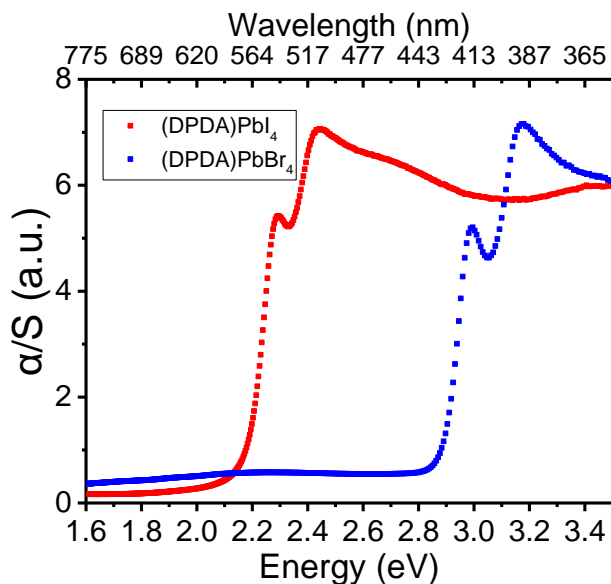

Figure S3. Reflectance spectroscopy of bulk powders of (DPDA)PbI<sub>4</sub> and (DPDA)PbBr<sub>4</sub>.

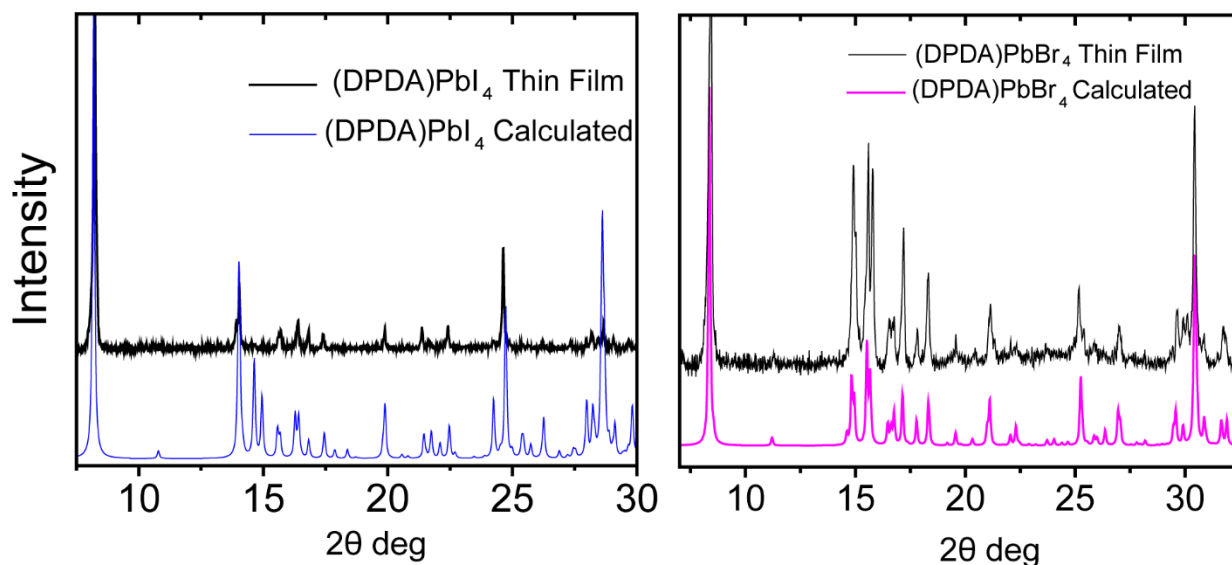

Figure S4. PXRD patterns of the spin coated thin films of (A) (DPDA)PbI<sub>4</sub> and (B) (DPDA)PbBr<sub>4</sub> in comparison with their respective calculated patterns from single crystal structures.

## References

- S1. Robinson, K.; Gibbs, G. V.; Ribbe, P. H., Quadratic elongation: a quantitative measure of distortion in coordination polyhedra. *Science* **1971**, 172, 567.
- S2. Brese, N. E.; O'Keeffe, M., Bond-valence parameters for solids. *Acta Crystallogr., Sect. B* **1991**, 47, 192-197.
